# Supplementary material
Source: publisher figshare collection journal article supplement (https://sage.figshare.com/ndownloader/files/14375900)
Supplement: Supplementary file 1 [file 14375900]

## Supplemental Material

### Appendix 1. Operational definitions of postoperative pulmonary complications

| Grade Definition |                                                                                                                                                                                                                                                                                                                                                                                                                                                                                                                                                                    |
|------------------|--------------------------------------------------------------------------------------------------------------------------------------------------------------------------------------------------------------------------------------------------------------------------------------------------------------------------------------------------------------------------------------------------------------------------------------------------------------------------------------------------------------------------------------------------------------------|
| 1                | Cough, dry<br><br>Microatelectasis: abnormal lung findings and temperature $> 37.5^{\circ}\text{C}$ without other documented cause; results of chest radiograph either normal or unavailable<br><br>Dyspnea, not due to other documented cause                                                                                                                                                                                                                                                                                                                     |
| 2                | Cough, productive, not due to other documented cause<br><br>Bronchospasm: new wheezing or preexistent wheezing resulting in change of therapy<br><br>Hypoxemia: alveolar-arterial gradient $> 29$ and symptoms of dyspnea or wheezing<br><br>Atelectasis: radiologic confirmation plus either temperature $> 37.5^{\circ}\text{C}$ or abnormal lung findings<br><br>Hypercarbia, transient, requiring treatment, such as naxolone or increased manual or mechanical ventilation<br><br>Adverse reaction to pulmonary medication (e.g. theophylline toxic reaction) |
| 3                | Pleural effusion, resulting in thoracentesis<br><br>Pneumonia, suspected: radiologic evidence without bacteriologic evidence<br><br>Pneumonia, proved: radiologic evidence and documentation of pathologic organism by Gram's stain or culture<br><br>Pneumothorax<br><br>Reintubation postoperatively, or period of ventilator dependence does not exceed 48 h                                                                                                                                                                                                    |
| 4                | Ventilatory failure: postoperative ventilator dependence exceeding 48 h, or reintubation with subsequent period of ventilator dependence exceeding 48 h                                                                                                                                                                                                                                                                                                                                                                                                            |
